# Supplementary material
Source: PubMed Central journal article supplement (PMC2443693)

**Supporting information to:**

**On the applicability of computer aided drug discovery to GPCRs: a comparison  
between molecular models and crystal structure of the  $\beta_2$ -adrenergic receptor**

Stefano Costanzi

J. Med. Chem. 2008

| <b>Table of Contents:</b>                                               | <b>Page</b> |
|-------------------------------------------------------------------------|-------------|
| Figure S1. Sequence alignment used for the construction of model 1..... | 2           |
| Figure S2. Sequence alignment used for the construction of model 2..... | 3           |
| Figure S3. Figure representing the docking box.....                     | 4           |

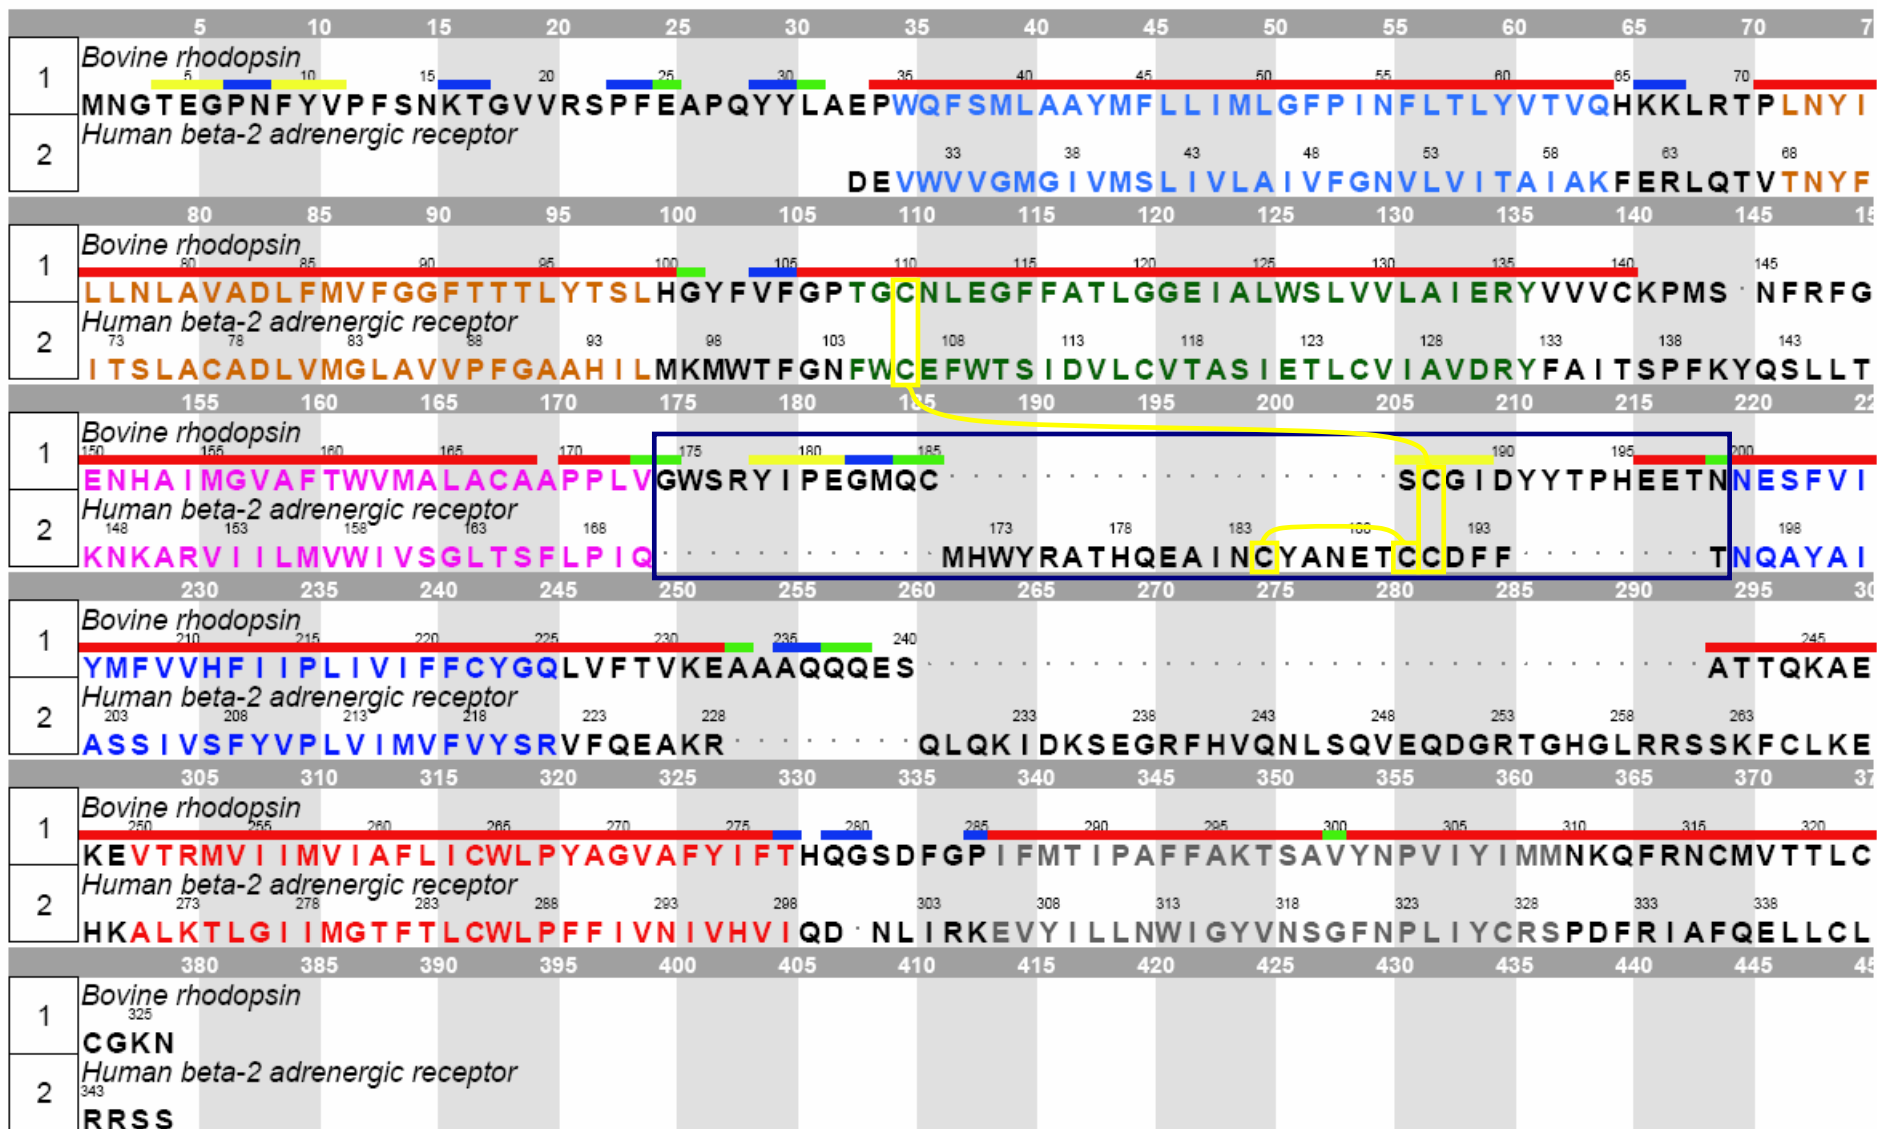

**Figure S1.** Sequence alignment of bovine rhodopsin and the beta-2 adrenergic receptor utilized for the construction of model 1. The second extracellular loop (blue box) was partially built by homology to rhodopsin. In particular, the conserved Cys in EL2 and the four adjacent residues that in rhodopsin form a beta-strand were aligned with the corresponding residues of the beta2 receptor. The seven transmembrane regions are color coded (TM1:light blue; TM2, Brown; TM3: green; TM4: purple; TM5: blue; TM6: red; TM7: gray). The figure was produced with MOE (Chemical Computing Group, Montreal, Canada).

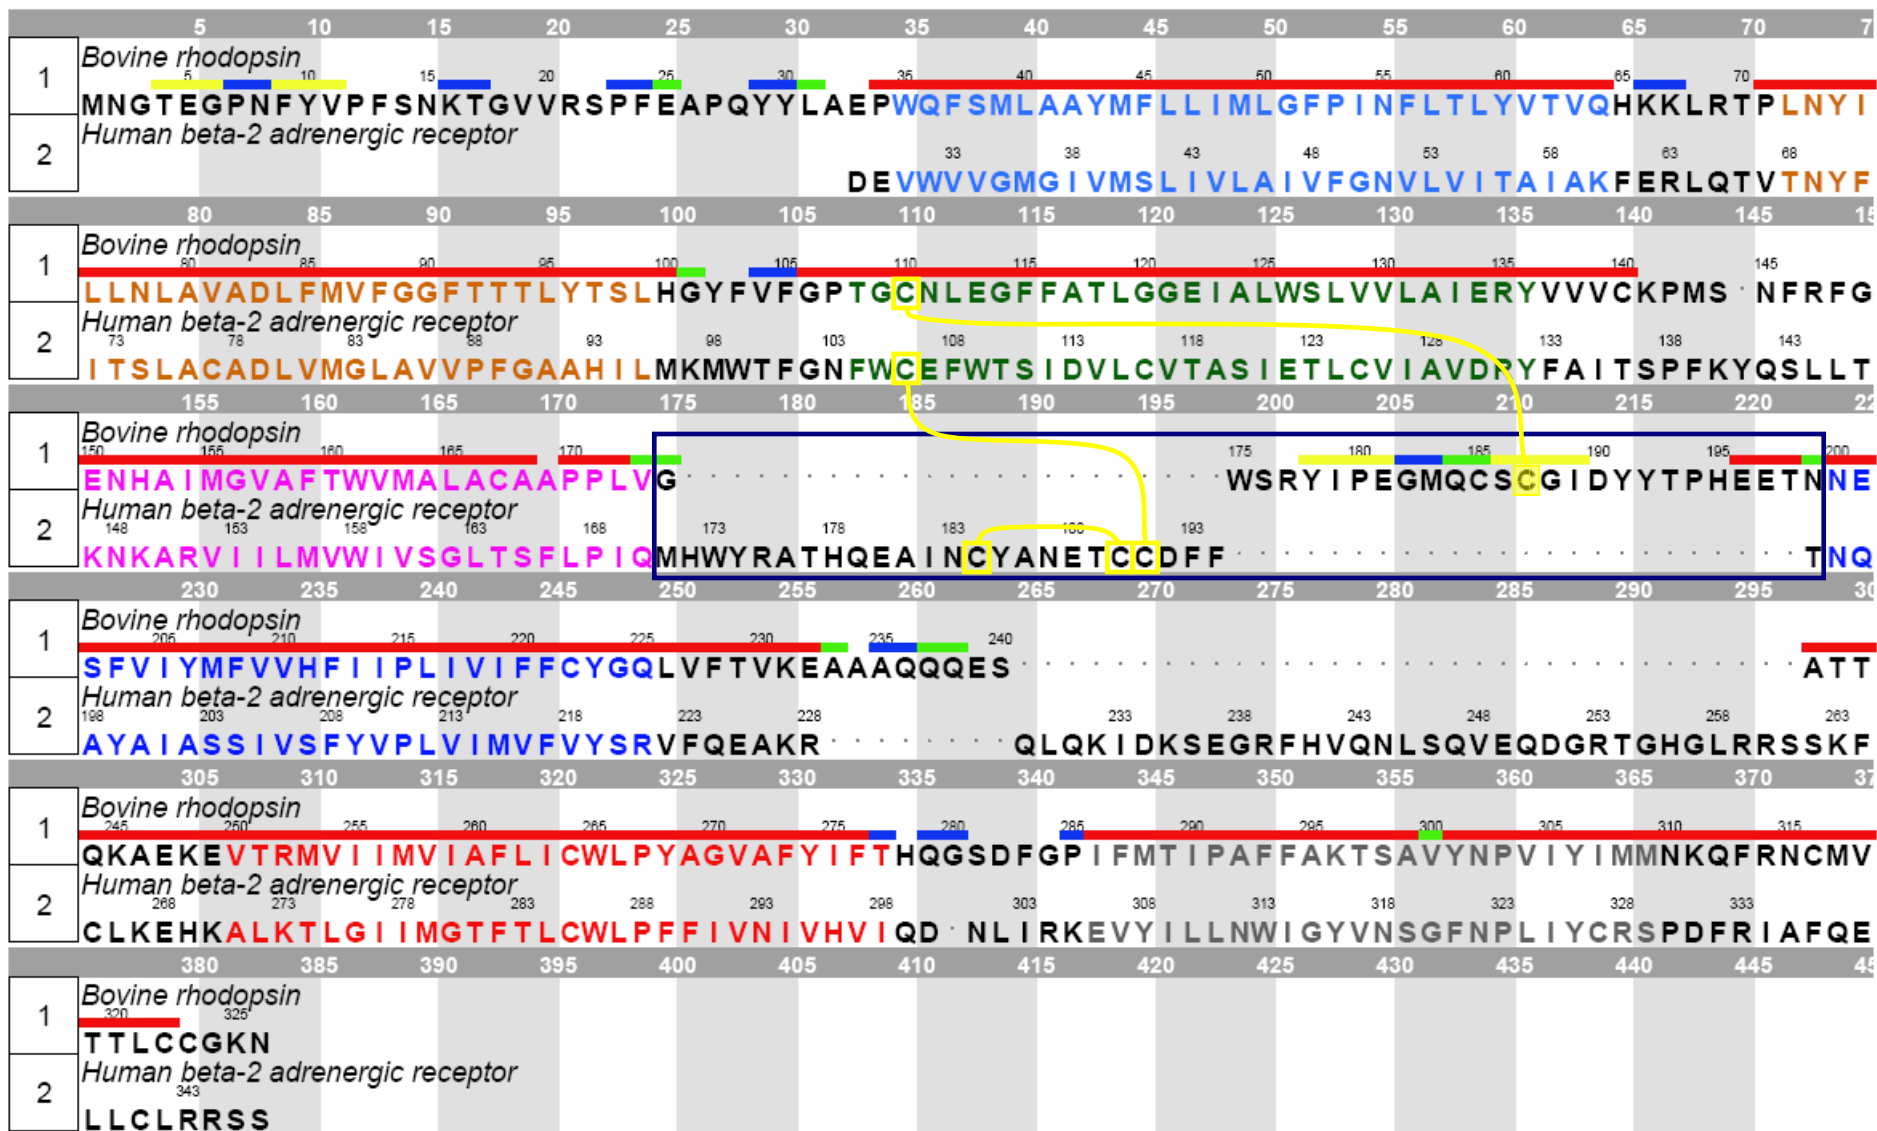

**Figure S2.** Sequence alignment of bovine rhodopsin and the beta-2 adrenergic receptor utilized for the construction of model 2. The second extracellular loop (blue box) was built completely de novo, without any alignment between the sequences of rhodopsin and the beta2 receptor. The seven transmembrane regions are color coded (TM1:light blue; TM2, Brown; TM3: green; TM4: purple; TM5: blue; TM6: red; TM7: gray). The figure was produced with MOE (Chemical Computing Group, Montreal, Canada).

**Figure S3.** The docking region, represented here in purple, was defined as a cubic box with a side of 26 Å and centered on Val114(3.33). The latter is located in a central position within the 7TM helical bundle, and is represented here in space filling mode.

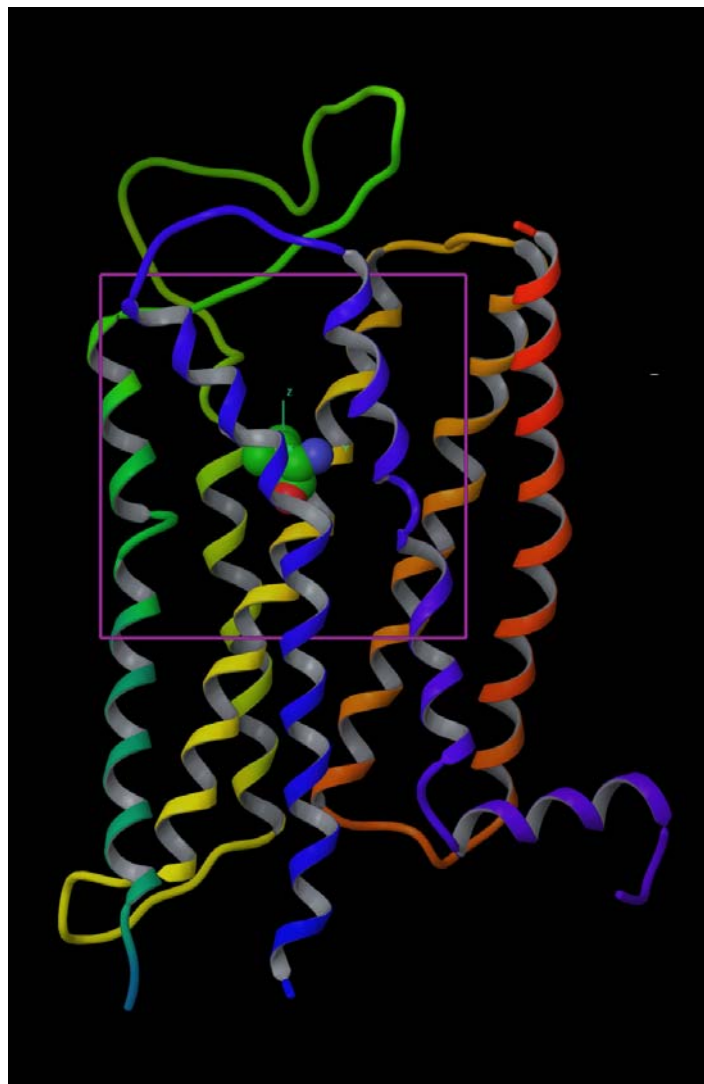

Supplement: NIHMS53110-supplement-2.pdf [file NIHMS53110-supplement-2.pdf]
